# Supplementary material
Source: PubMed Central journal article supplement (PMC6039277)
Supplement: NIHMS965567-supplement-1.pdf [file NIHMS965567-supplement-1.pdf]

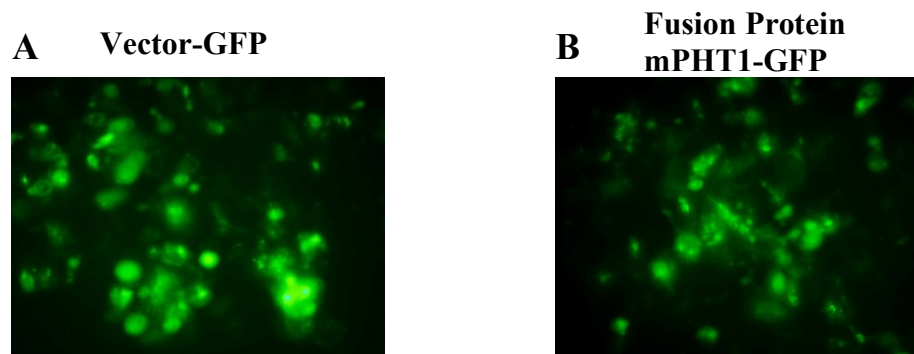

**FIGURE S1.** Fluorescence microscopy of mPht1-transfected HEK293 cells. (A) mock cells were transfected by the vector pcDNA3.1-CT-GFP and (B) mPht1-containing cells were transfected by the vector pcDNA3.1-mPht1/CT-GFP (40x magnification).
